# Supplementary material
Source: PubMed Central journal article supplement (PMC6454458)
Supplement: dey013suppl_figure1.pdf [file dey013suppl_figure1.pdf]

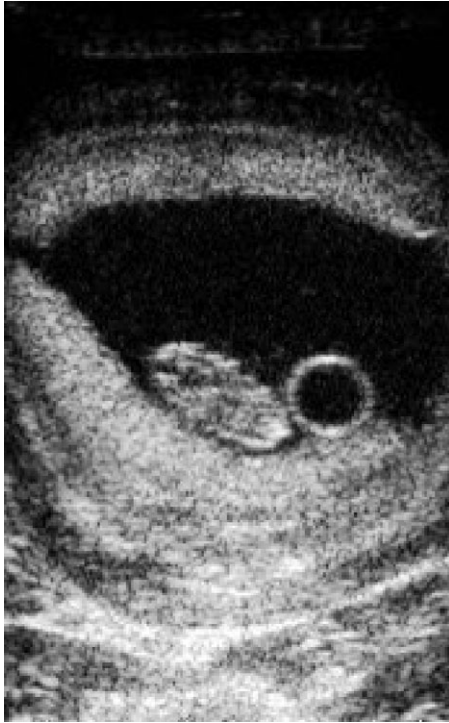

**Supplementary Figure S1** Ultrasound image of a gestational sac of a control female at gestation Day 32, 45 days post-menses. The forming disks are visible as opaque thickenings on anterior and posterior sides of the cavity, and the fetus and yolk sac are located on the posterior side of the cavity. This is the gestational sac imaged by contrast-enhanced ultrasound in Supplementary Movie S1, with the same orientation and depth of field.
